# Supplementary material
Source: publisher figshare collection journal article supplement (https://acs.figshare.com/ndownloader/files/35058777)
Supplement: Supplementary file 1 [file 35058777]

## **Supplementary information**

### **Enhanced codon-anticodon interaction at in-frame UAG stop codon improves efficiency of non-natural amino acid mutagenesis**

Purnima Mala<sup>+</sup> and Ishu Saraogi<sup>+,\*</sup>

<sup>+</sup>Department of Biological Sciences, Indian Institute of Science Education and Research Bhopal, Bhopal 462066, India

<sup>\*</sup>Department of Chemistry, Indian Institute of Science Education and Research Bhopal, Bhopal 462066, India

Corresponding author email: [ishu@iiserb.ac.in](mailto:ishu@iiserb.ac.in)

**Scheme S1.** The DNA oligonucleotides used for the synthesis of the RNA fragments F1 and F3.

**S1a** Double stranded F1 DNA template – T7 promoter + *Hammerhead Ribozyme* + **F1 DNA**

5'TAATACGACTCACTATAGGGCCGGGACCGGCTGATGAGTCCGTGAGGACGAAACGGTACCCGGTACCGTCCCGGCGGTAGTTCAGCAGGGCAGAAC3'  
3'ATTATGCTGAGTGATATCCCGGCCCTGGCCGACTACTCAGGCACTCCTGCTTTGCCATGGGCCATGGCAGGGCCGCATCAAGTCGTCCCGTCT<sub>m</sub>T<sub>m</sub>G5'

The double stranded F1 DNA template was prepared by overlapping PCR to perform *in vitro* transcription. The underlined sequence in the ribozyme permits the ribozyme to specifically anneal to underlined sequences in the target RNA to cleave F1 RNA specifically after transcription. The cis-cleaving ribozyme generates the correct 5'-end transcript, thus removing 5'-end heterogeneity. The <sub>m</sub>T and <sub>m</sub>G bases represent 2'-O-methylated thymine and guanine at the last two positions in the DNA template to generate the correct 3'-end transcript, thus removing 3'-end heterogeneity.

**S1b** Double stranded F3 DNA template – T7 promoter + *Hammerhead Ribozyme* + **F3 DNA**

5'TAATACGACTCACTATAGGGGATTGACCGGCTGATGAGTCCGTGAGGACGAAACGGTACCCGGTACCGTCAATCCGCATGGCAGGGGTTCAAATCCCCTCCGCCGGACCA3'  
3'ATTATGCTGAGTGATATCCCCTAATCTGGCCGACTACTCAGGCACTCCTGCTTTGCCATGGGCCATGGCAGTTAGGCGTACCGTCCCCAAGTTAGGGGAGGCGGCCTG<sub>m</sub>G<sub>m</sub>T5'

The double stranded F3 DNA template was prepared by overlapping PCR to perform *in vitro* transcription. The underlined sequence in the ribozyme permits the ribozyme to specifically anneal to underlined sequences in the target RNA to cleave F3 RNA specifically after transcription. The cis-cleaving ribozyme generates the correct 5'-end transcript, thus removing 5'-end heterogeneity. The <sub>m</sub>G and <sub>m</sub>T bases represent 2'-O-methylated guanine and thymine at the last two positions in the DNA template to generate the correct 3'-end transcript, thus removing 3'-end heterogeneity.

**S1c** DNA splint sequence is complementary to RNA fragments

3'- AAGTCGTCCCGTCTTGCCGCCTGAGATTTAGGCGTACCGTC -5' (41nt DNA splint)  
5'CCGGCGGUAGUUCAGCAGGGCAGAACGGCGGDCUCUDAAUCCGCAUGGCAGGGGUUCAAUCCCCUCCGCCGGACCA3'  
(full-length tRNA after ligation)

The 41nt DNA splint was designed to be complementary to 16nt of **F1 RNA**, complete 11nt of **F2 RNA**, and 14nt of **F3 RNA** for specific annealing of RNA fragments allowing correct end-joining of tRNA<sub>CUD</sub> using T4 DNA ligase.

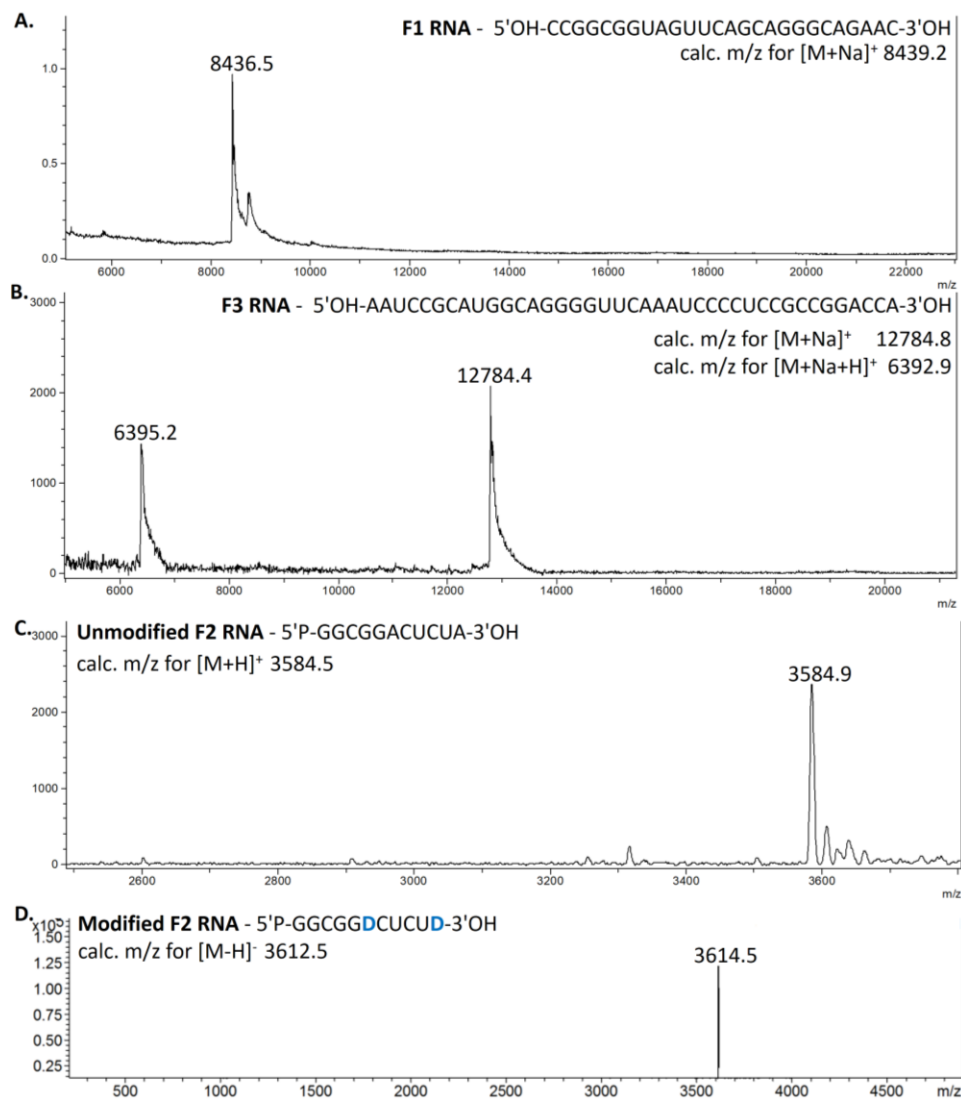

Fig. S1. Mass spectrometric characterization of purified RNA fragments. MALDI-TOF-MS of A. F1 RNA and B. F3 RNA fragment. C. F2 RNA fragment. D. Deconvoluted ESI-MS spectrum of two 2,6-diaminopurine (D) containing F2 RNA fragment.

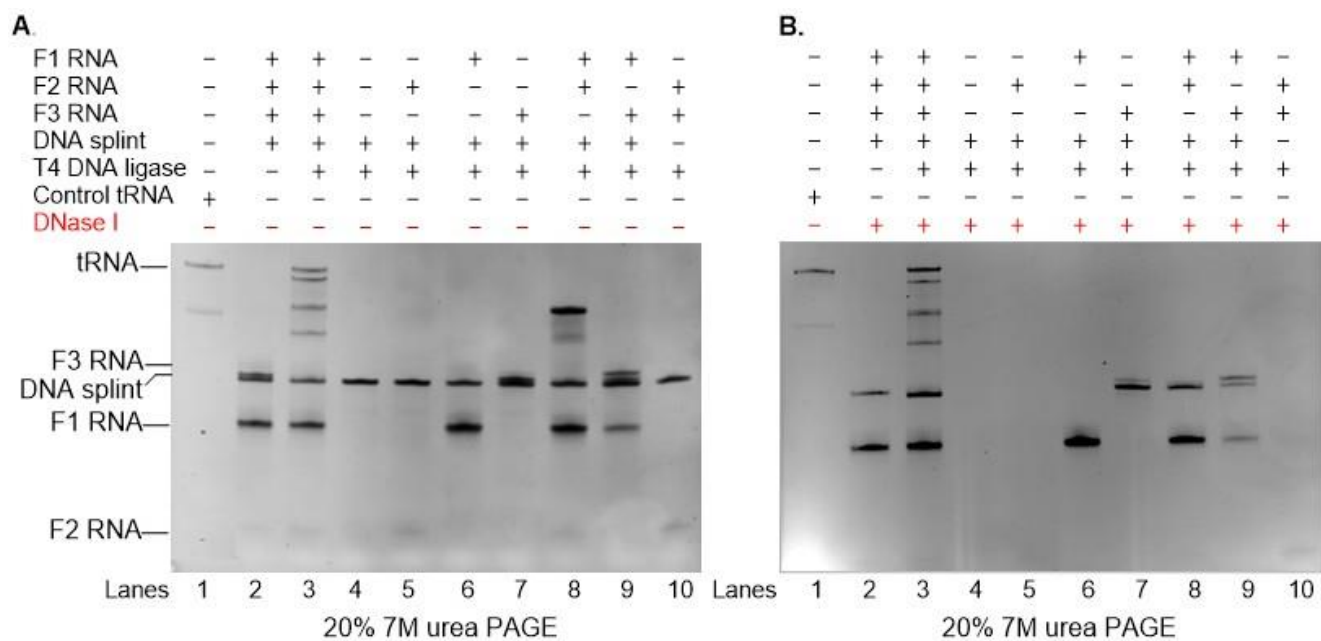

Fig. S2. Analysis of *in vitro* ligation reaction using F1 RNA (5  $\mu$ M), F2 RNA (10  $\mu$ M), F3 RNA (5  $\mu$ M), and DNA splint (2.5  $\mu$ M) on 20% 7 M urea PAGE. A. The gel was run without DNase I treatment. B. The gel was run after DNase I treatment.

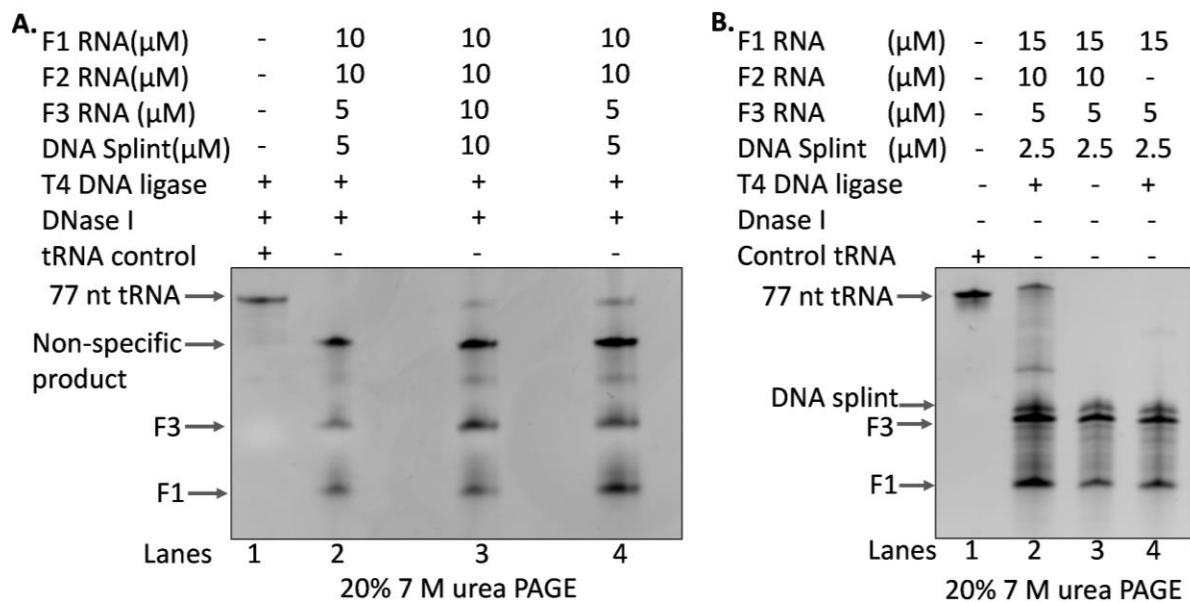

Fig. S3. Optimization of *in vitro* ligation reaction for generation of tRNA<sub>CUD</sub> with different concentrations of RNA fragments and DNA splint. Lane 1: 77nt tRNA was used as a positive control.

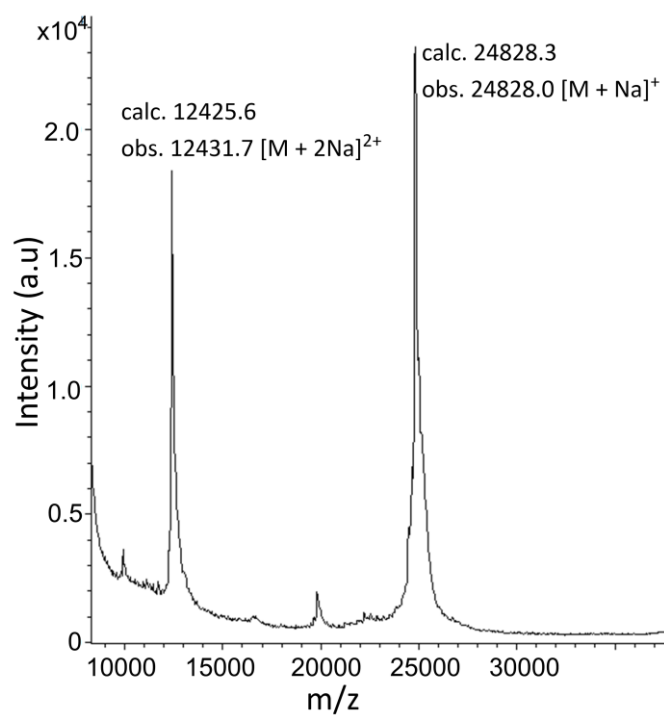

Fig. S4. MALDI-TOF-MS spectra of purified full-length tRNA<sub>CUA</sub> generated through *in vitro* transcription.

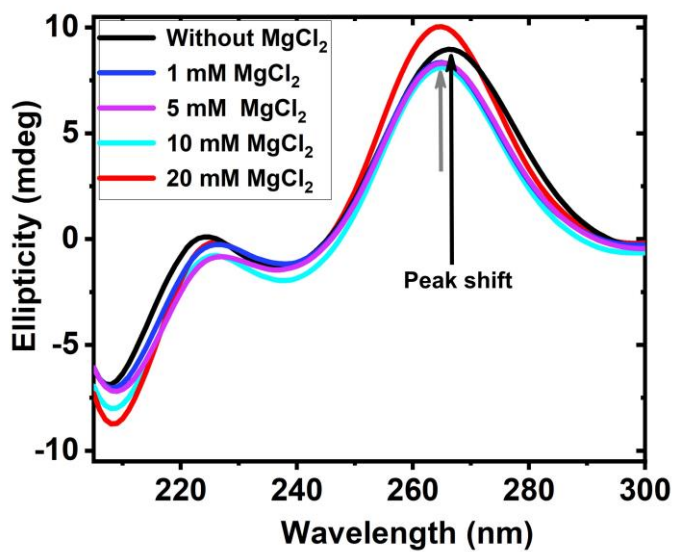

Fig. S5. CD spectra at 25°C for 3  $\mu$ M refolded native tRNA<sup>Tyr</sup><sub>CUA</sub> at different  $MgCl_2$  concentrations.

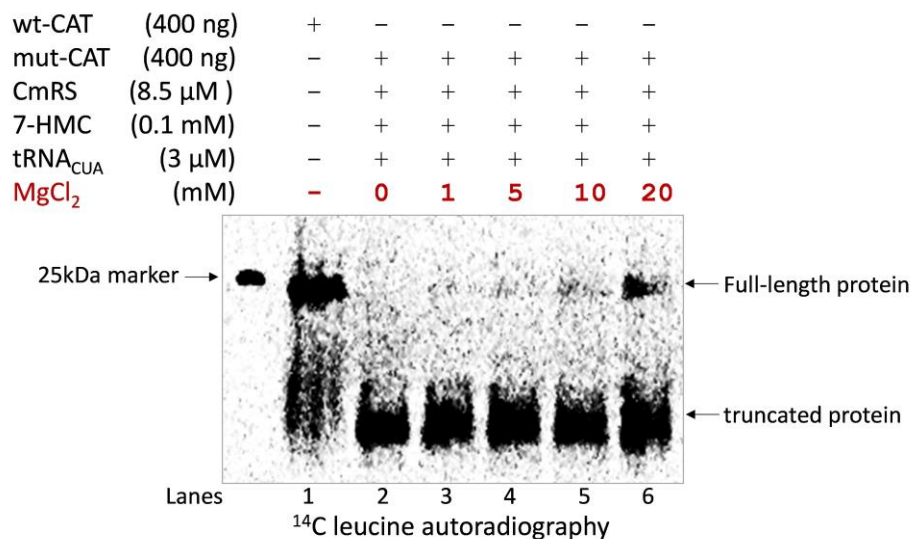

Fig. S6. <sup>14</sup>C leucine autoradiography of an *in vitro* translation reaction using tRNA<sup>Tyr</sup><sub>CUA</sub> that was refolded with different MgCl<sub>2</sub> concentrations. Full length product is only expected when the natively folded tRNA<sub>CUA</sub> is present along with the non-natural amino acid (7-HMC) and cognate aminoacyl tRNA synthetase (CmRS).

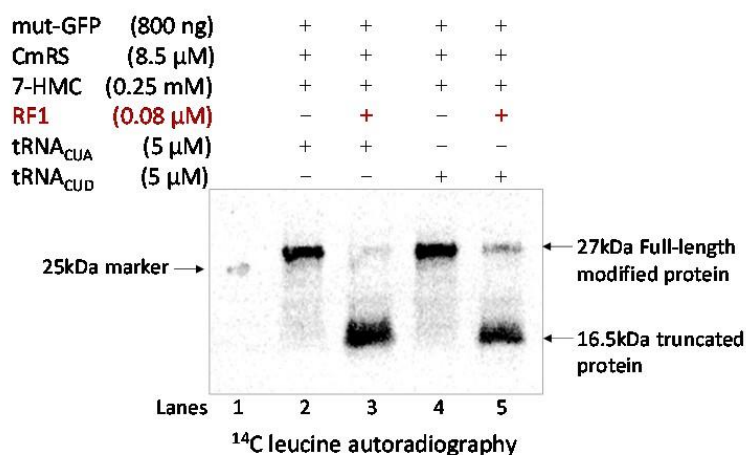

Fig. S7. <sup>14</sup>C leucine autoradiography of an *in vitro* translation reaction in presence and absence of RF1 using NEB PURExpress kit with tRNA analogs. Lane 2; tRNA<sup>Tyr</sup><sub>CUA</sub> in the absence of RF1. Lane 3; tRNA<sup>Tyr</sup><sub>CUA</sub> in the presence of RF1. Lane 4; tRNA<sup>Tyr</sup><sub>CUD</sub> in the absence of RF1. Lane 5; tRNA<sup>Tyr</sup><sub>CUD</sub> in the presence of RF1.
